# Supplementary material for: MnO2 doped CeO2 with tailored 3-D channels exhibits excellent performance for NH3-SCR of NO
Source: Royal Society of Chemistry journal article supplement (doi:10.1039/c5ra01355k), 2015-01-01
Supplement: c5ra01355k1.pdf [file c5ra01355k1.pdf]

## SUPPORTING INFORMATION

### **MnO<sub>2</sub> doped CeO<sub>2</sub> with tailored 3-D channel exhibit excellent performance for NH<sub>3</sub>-SCR of NO**

**Yajuan Wei<sup>a</sup>, Yan Sun<sup>a</sup>, Wei Su<sup>b</sup>, Jia Liu<sup>\*b</sup>**

#### MD Simulation

If the system is fluid, Mean square displacement (MSD) grows linearly with time. In this case it is useful to characterize the system behaviour in terms of the slope, which is the diffusion coefficient  $D$

$$D = \lim_{t \rightarrow \infty} \frac{1}{6t} \langle |r(t) - r(0)|^2 \rangle$$

The average mean square displacement of all the atoms in a simulation can be easily computed by Monte Carlo method

The slit model were represented by two surface (0 0 1) of  $\beta$  MnO<sub>2</sub> with a gap (Scheme S1). The box consisted of  $4 \times 4 \times 2$  unit cells was used and periodic boundary conditions were applied in every direction for each simulation. Geometry optimization and charge allocation were calculated by Forcite and DMol3. Water molecule trajectories in the slits at 393 K under 0.06 bar were simulated by Forcite dynamics task. Universal Force Field was used for all the atoms and the Coulombic interactions were calculated using the Ewald summation method. A dynamic simulation runs using NVT Ensemble. Time-step is 0.1 fs and total simulation time is 15 ps.

Shown as Figure S1, at the beginning of 2ps, the plot of MSD is proportional to  $t^2$ , which indicates that motion in this regime is not diffusive; it is in fact ballistic. The diffusion coefficient can be roughly estimate by calculating the slope of the linear portion of the curve.

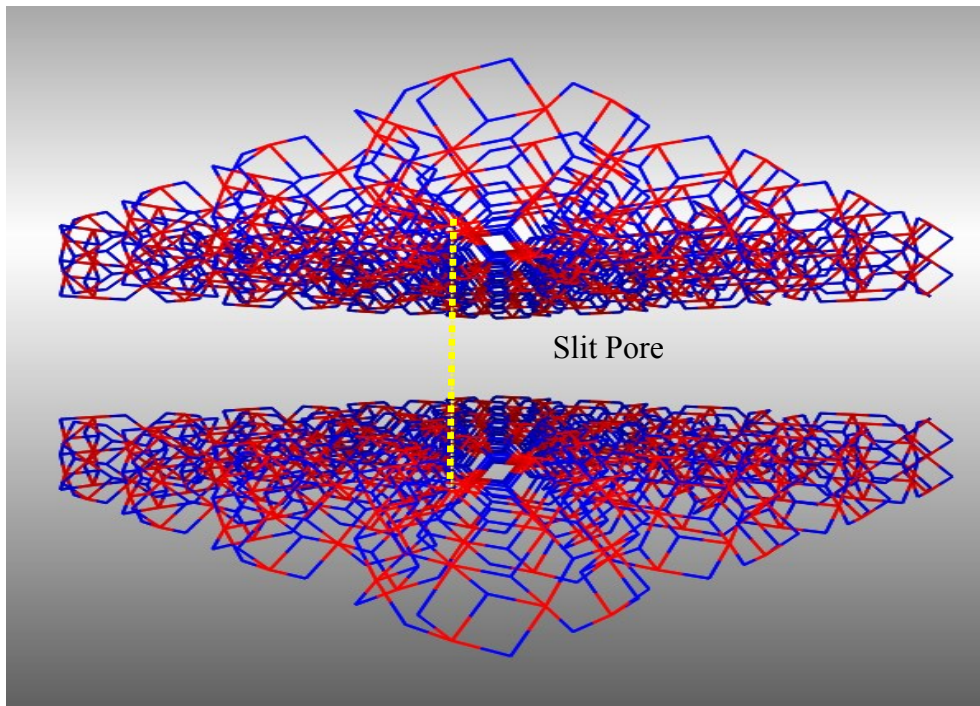

Scheme S1. Slit pore model of MnO<sub>2</sub>

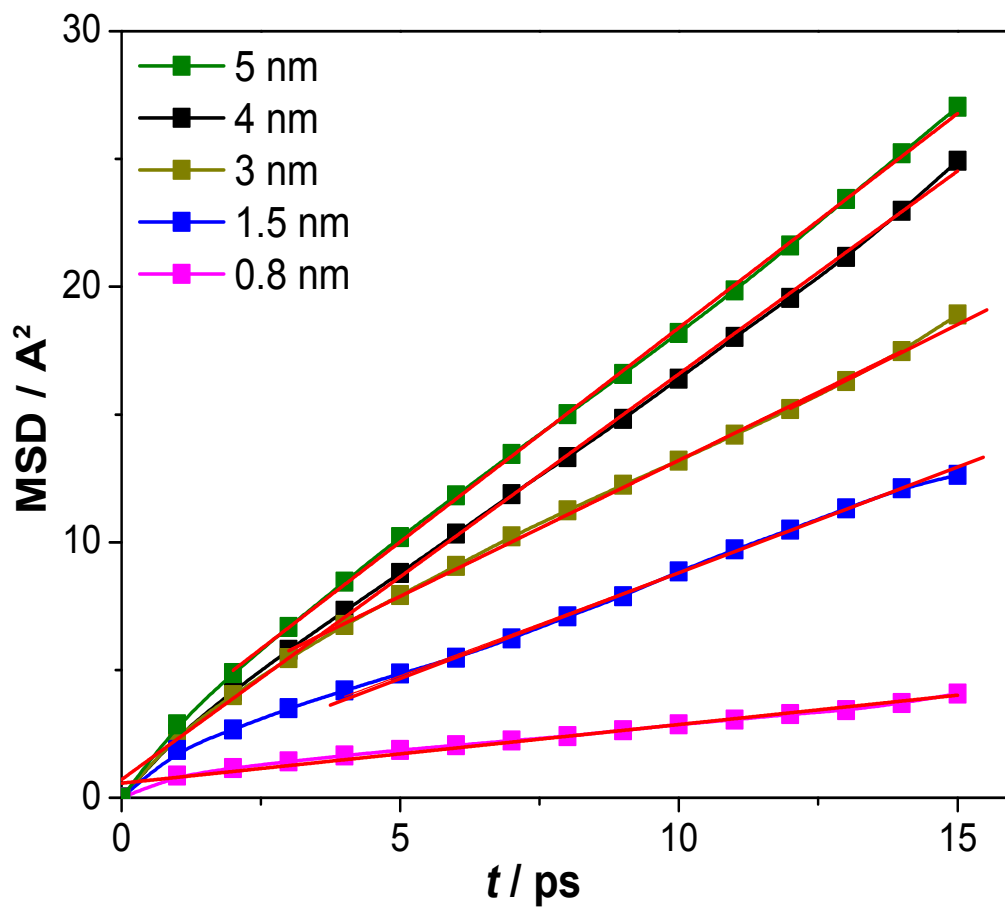

Figure S1 MSD curve of different model

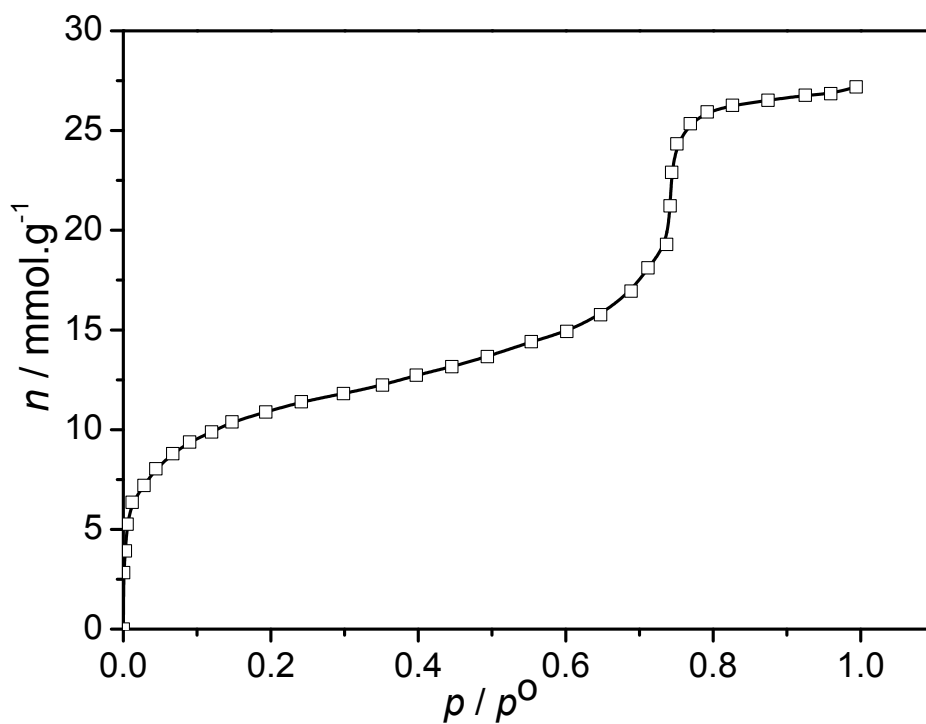

Figure S2 N<sub>2</sub> isotherm on KIT-6 at 77 K

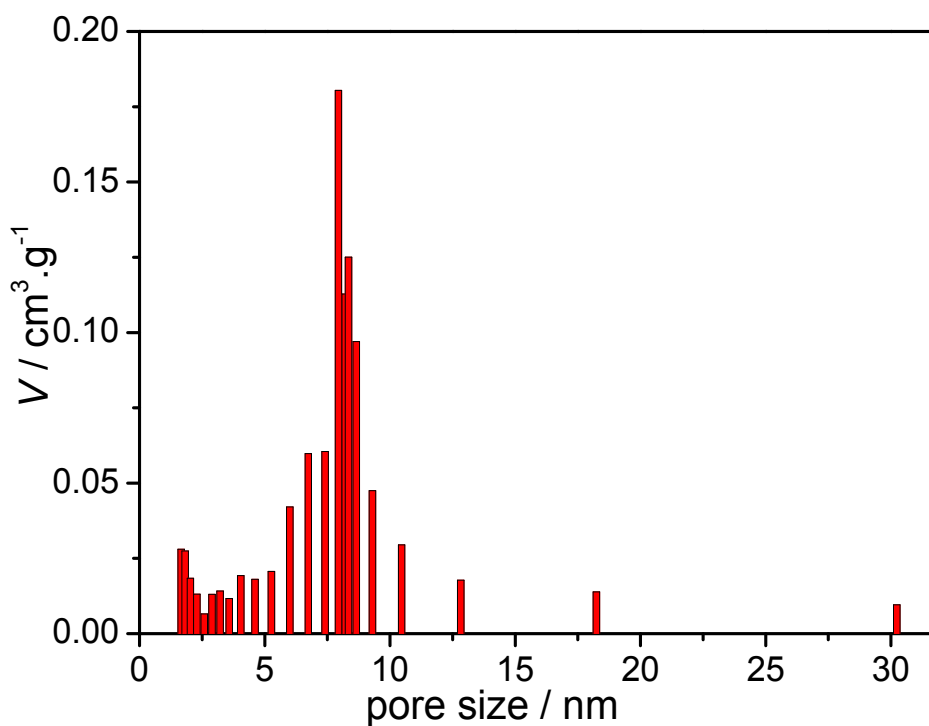

Figure S3. Porous distribution of KIT-6 calculated by BJH method

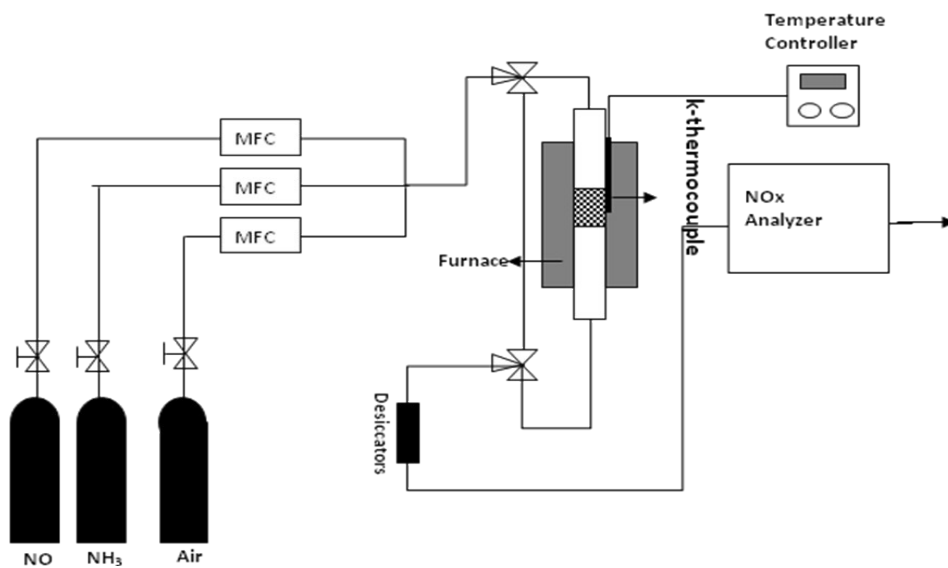

**Scheme S2.** The denitrification system of SCR

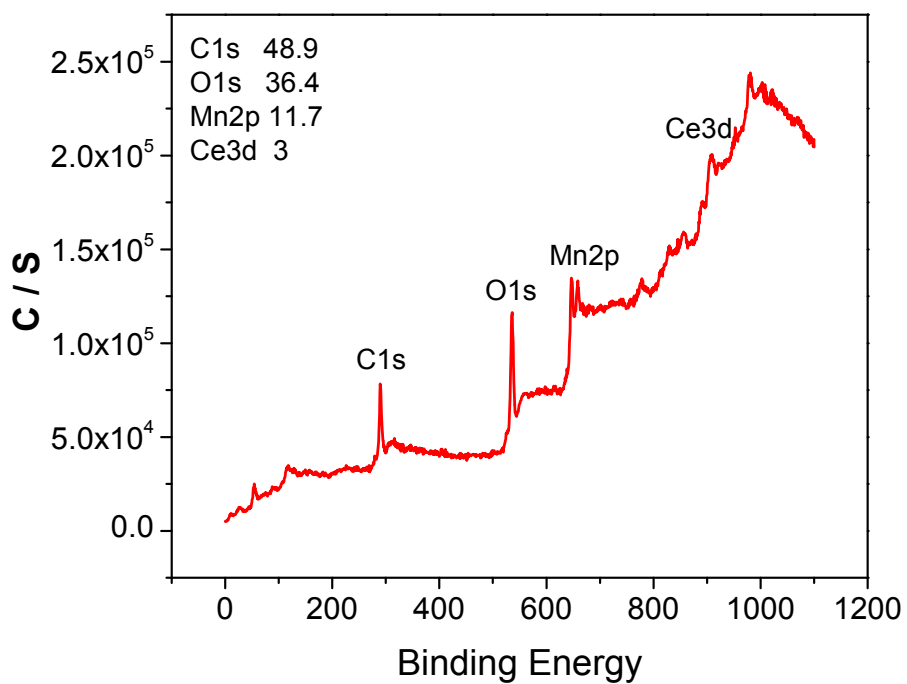

**Figure S4.** C1s O1s Mn2p Ce3d from XPS spectra of meso-porous MnO<sub>2</sub> doped CeO<sub>2</sub>

**Table S1.** Water diffusion coefficients at 393 K under 0.006 bar (simulation results)

| Slit size (nm)                                                   | 0.8   | 1.5  | 3    | 4    | 5    |
|------------------------------------------------------------------|-------|------|------|------|------|
| Diffusion coefficient<br>( $10^{-5} \text{ cm}^2\text{s}^{-1}$ ) | 0.335 | 1.35 | 1.75 | 2.63 | 2.78 |

**Table S2** Data for kinetic calculation

| T, °C | 1/T ,K    | $\eta_{\text{NO}}$ | $\ln(-\ln(1 - \eta_{\text{NO}}))$ |
|-------|-----------|--------------------|-----------------------------------|
| 75    | 0.0028736 | 0.05714            | -2.83298                          |
| 100   | 0.002681  | 0.25429            | -1.22616                          |
| 125   | 0.0025126 | 0.50875            | -0.34136                          |
| 150   | 0.0023641 | 0.72571            | 0.257405                          |
| 175   | 0.0022321 | 0.85153            | 0.645727                          |

**Table S3** Results of kinetic calculation

| Temperature range | Slop    | intercept | Ea(kJ/mol) | P         |
|-------------------|---------|-----------|------------|-----------|
| T (125 °C-175 °C) | -3530.0 | 8.55      | 29.3       | 26.14     |
| T (75 °C -125 °C) | -6936.3 | 17.18     | 57.7       | 146554.24 |
